# Supplementary material for: IRAK1-dependent Regnase-1-14-3-3 complex formation controls Regnase-1-mediated mRNA decay
Source: eLife journal article supplement (doi:10.7554/elife.71966), 2021-10-12

Figure 1—figure supplement 1

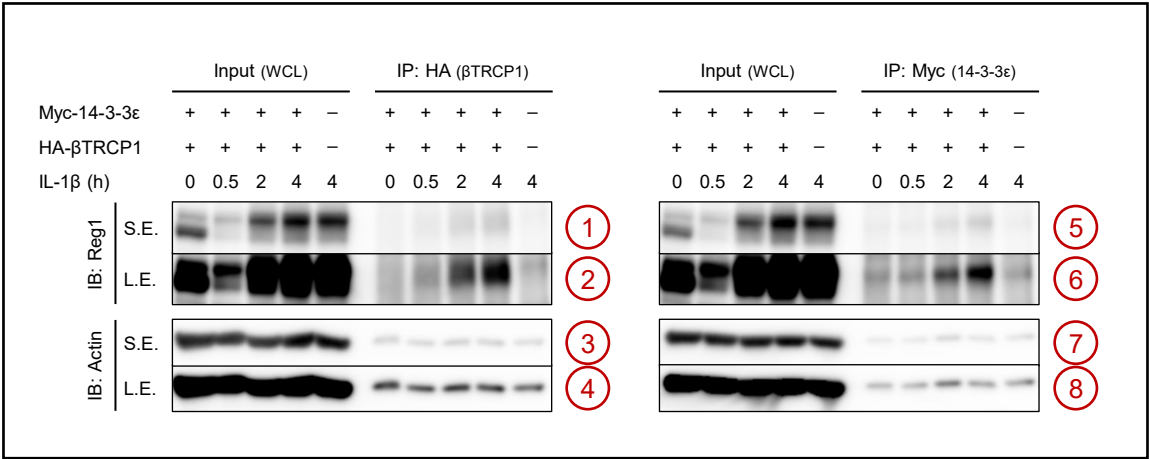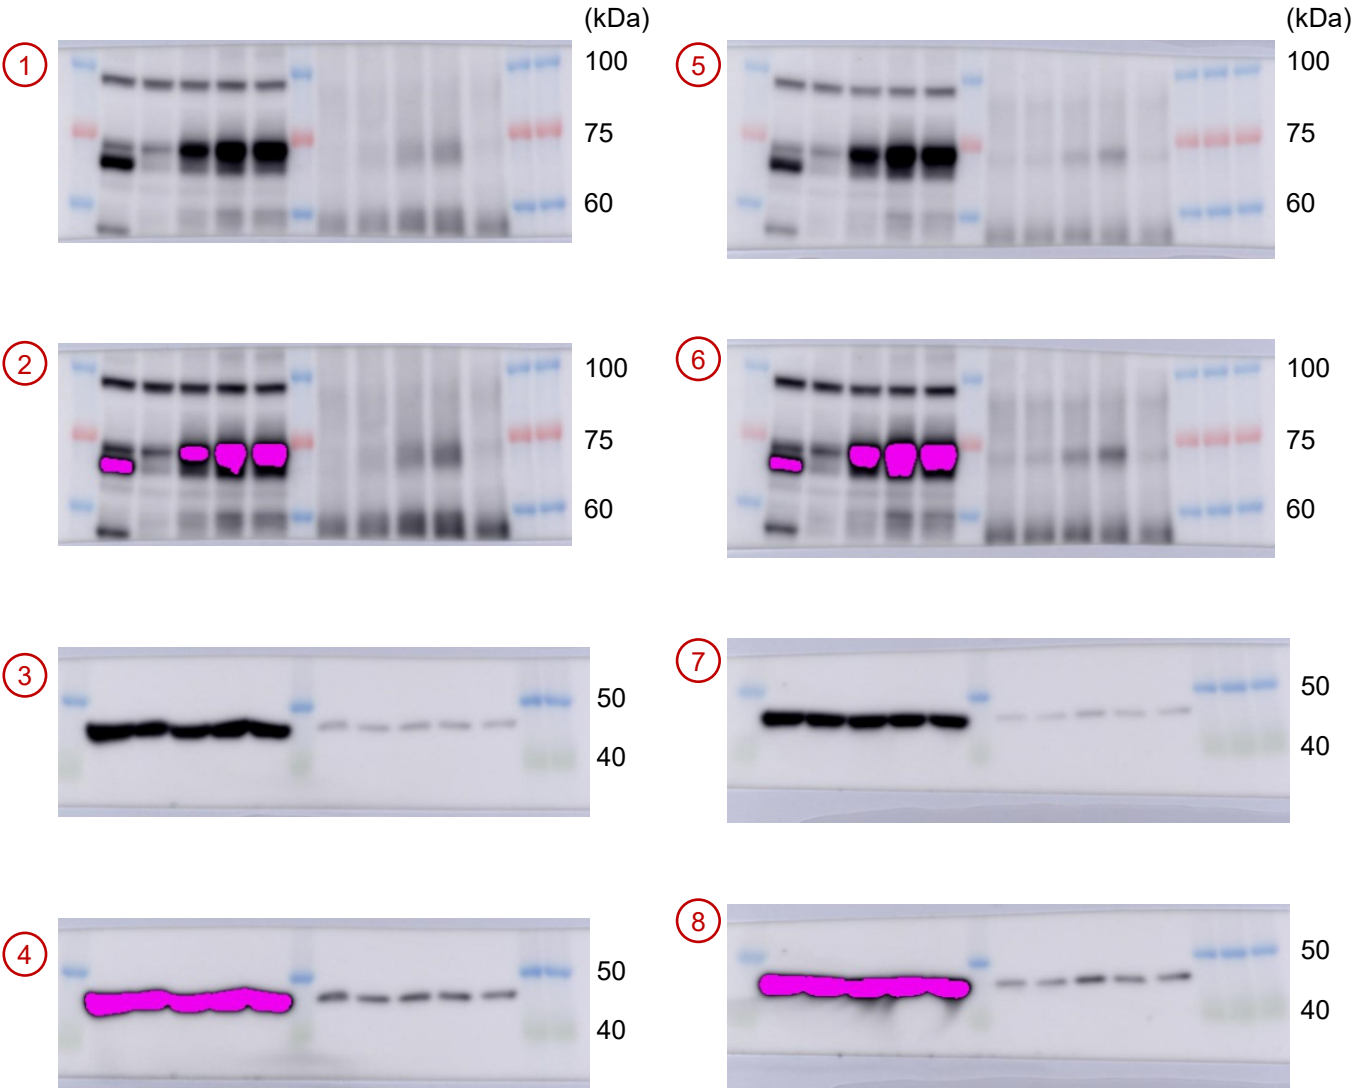

Figure 1—figure supplement 2

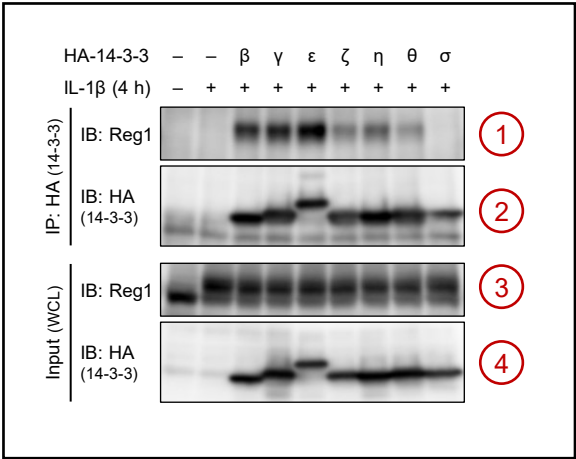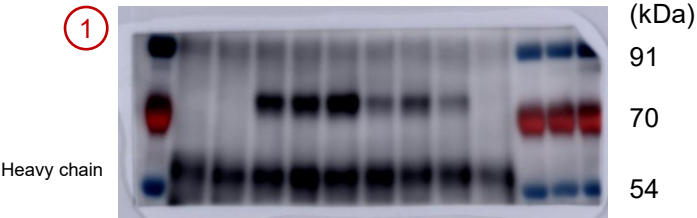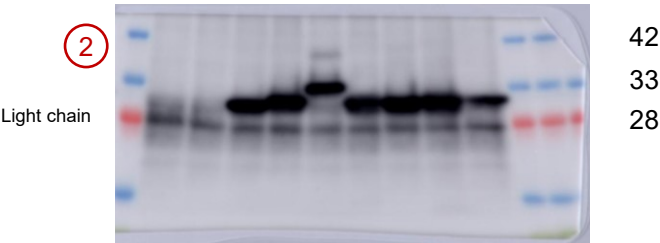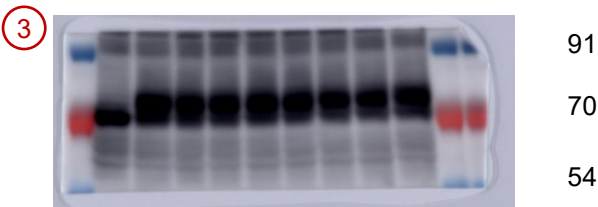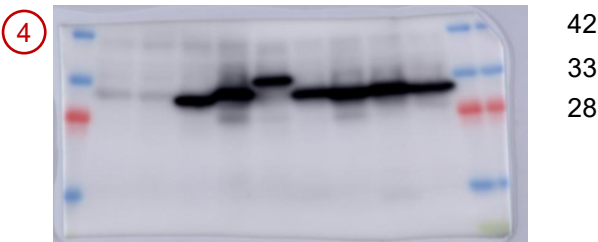

Figure 2—figure supplement 1

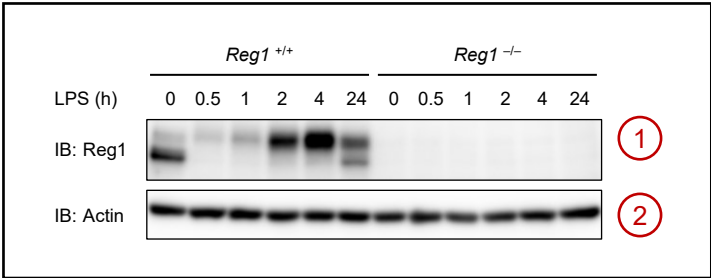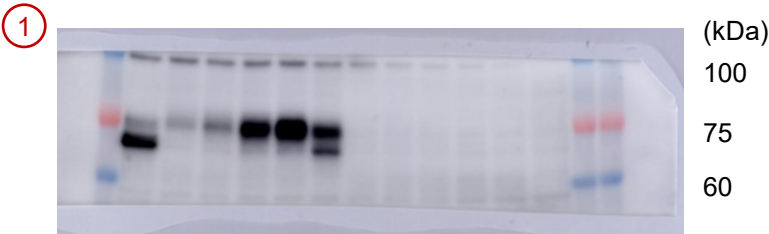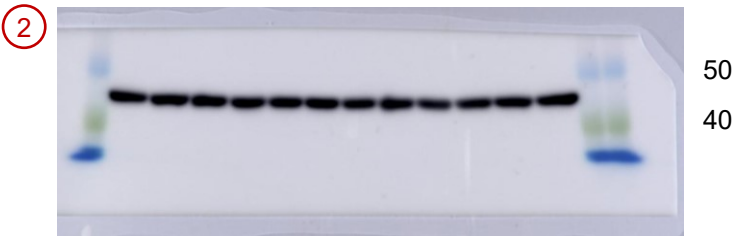

Figure 2—figure supplement 3

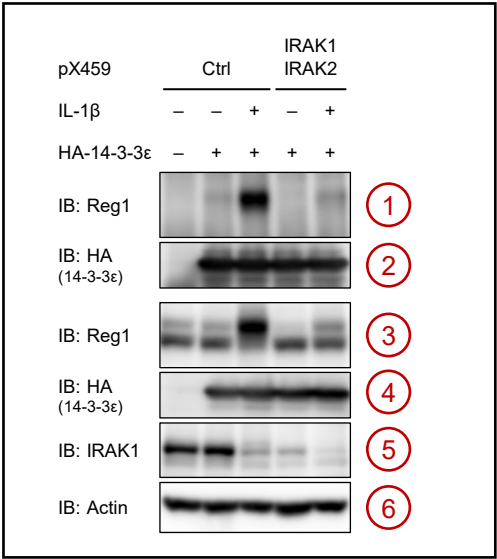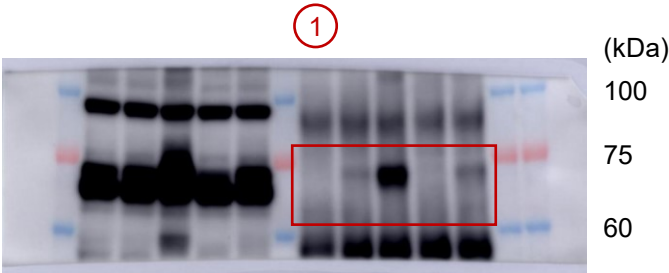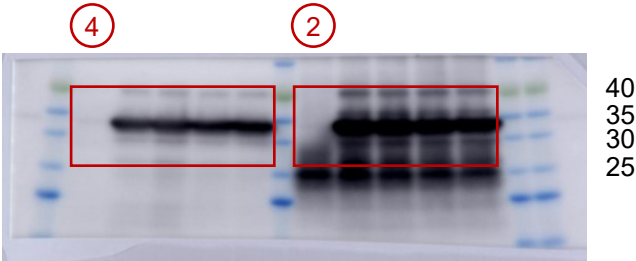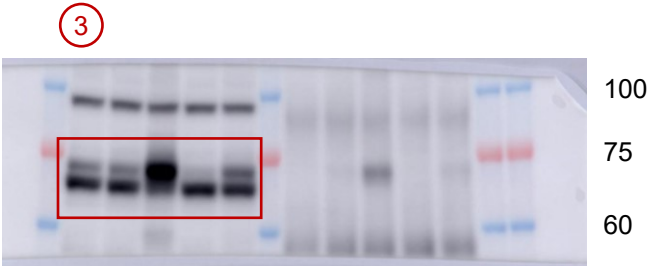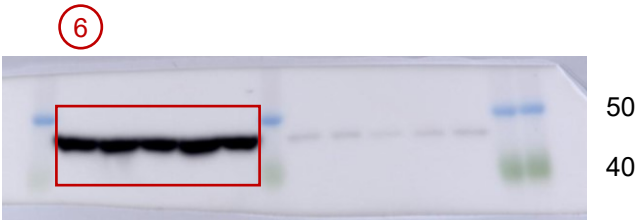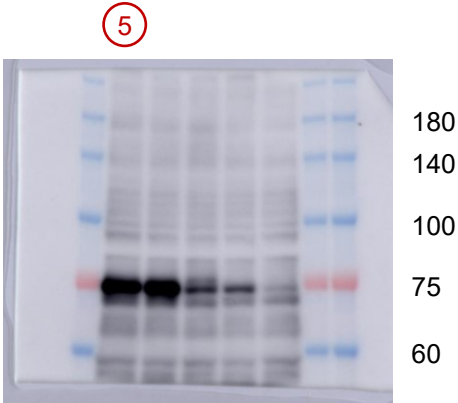

Figure 2—figure supplement 8

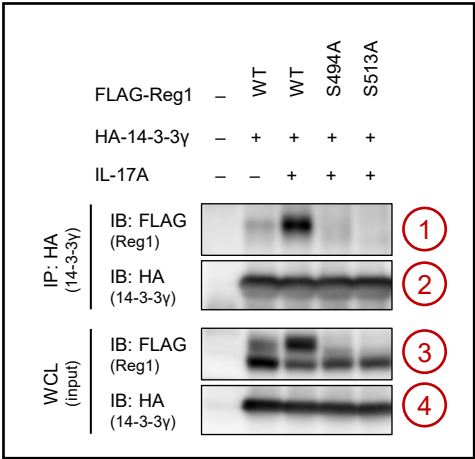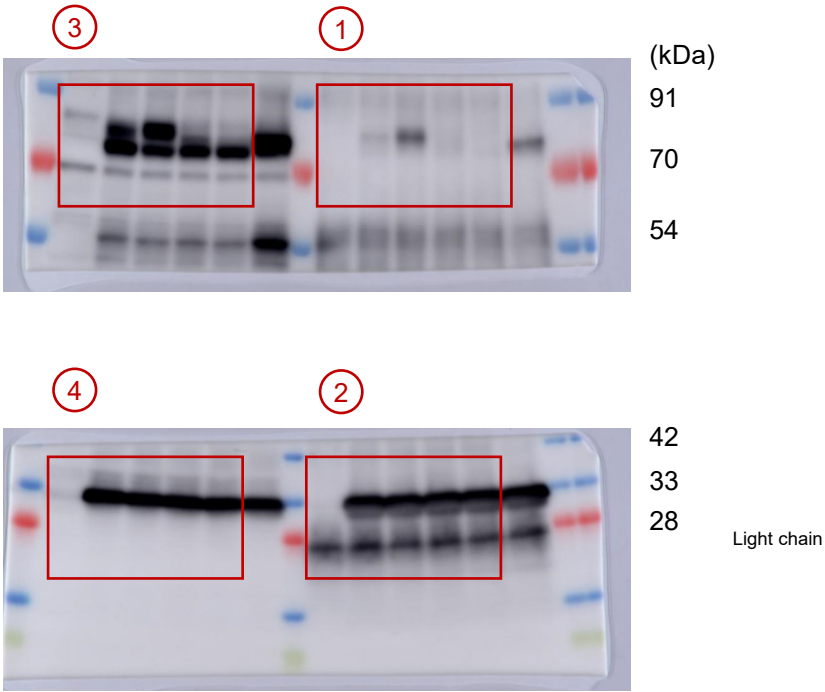

Figure 4—figure supplement 2

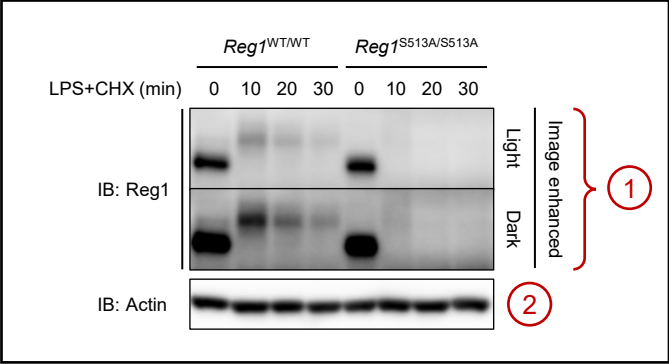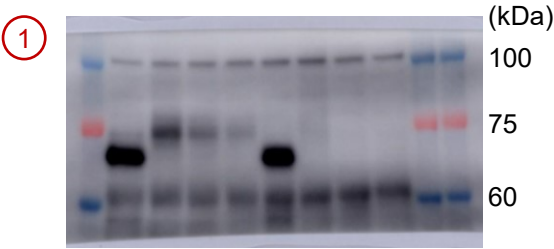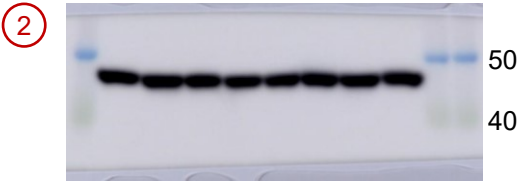

Figure 5—figure supplement 1

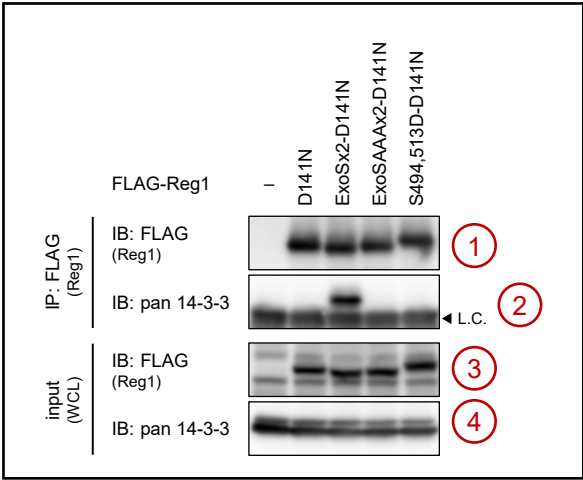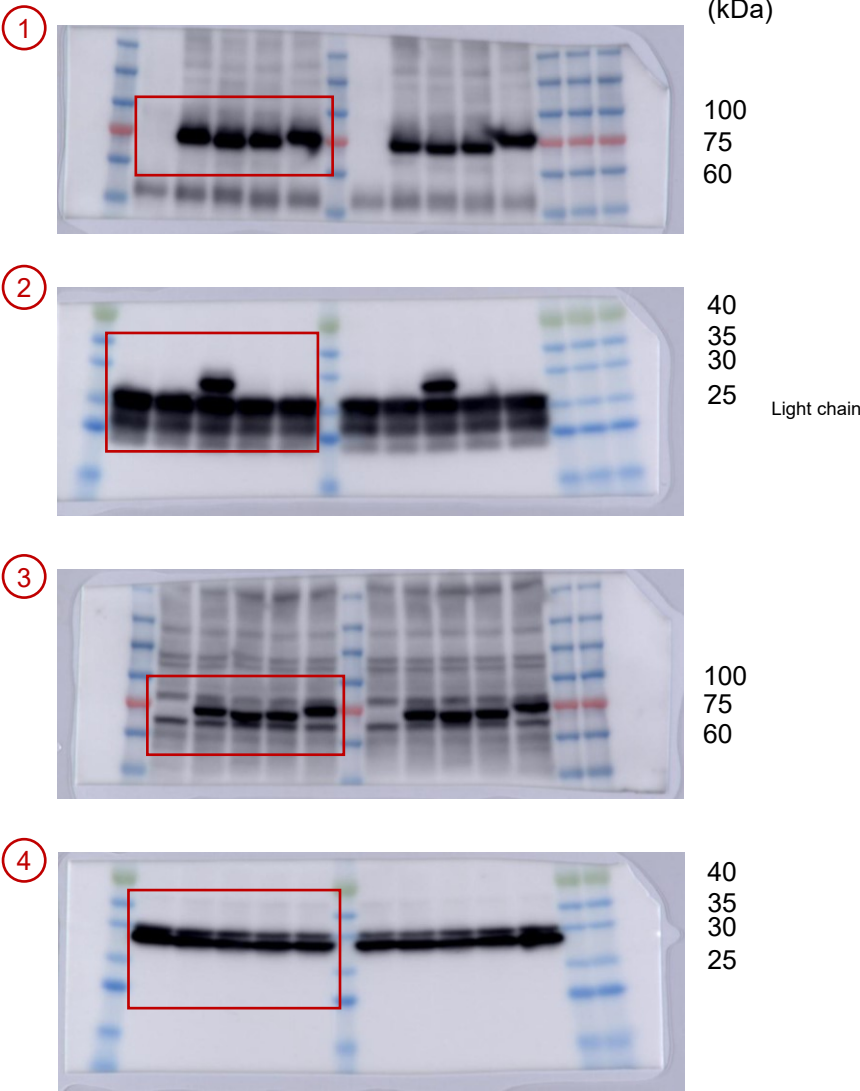

Supplement: supp [file elife-71966-supp-v1.zip]
