# Supplementary material for: IRAK1-dependent Regnase-1-14-3-3 complex formation controls Regnase-1-mediated mRNA decay
Source: eLife journal article supplement (doi:10.7554/elife.71966), 2021-10-12

Figure 1-C

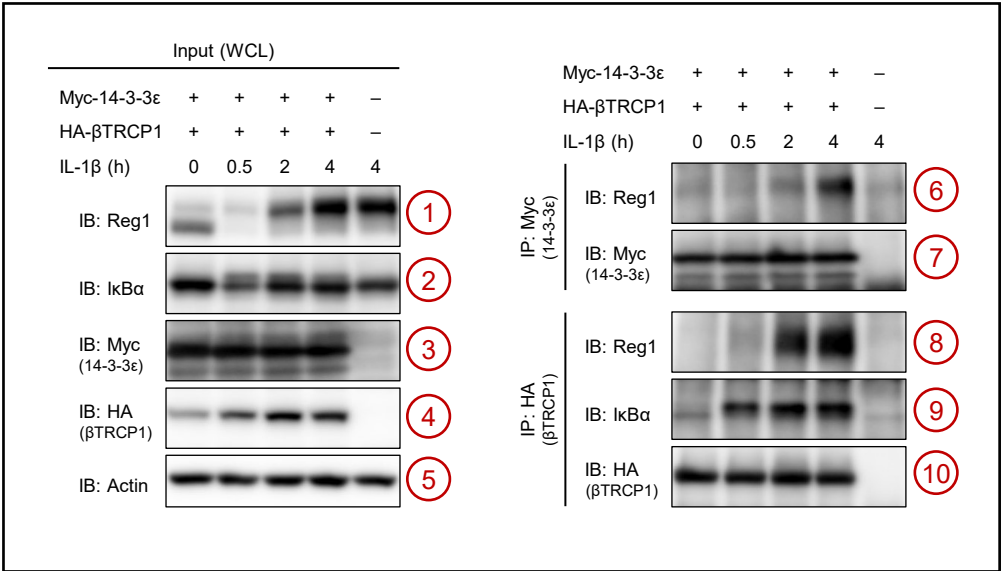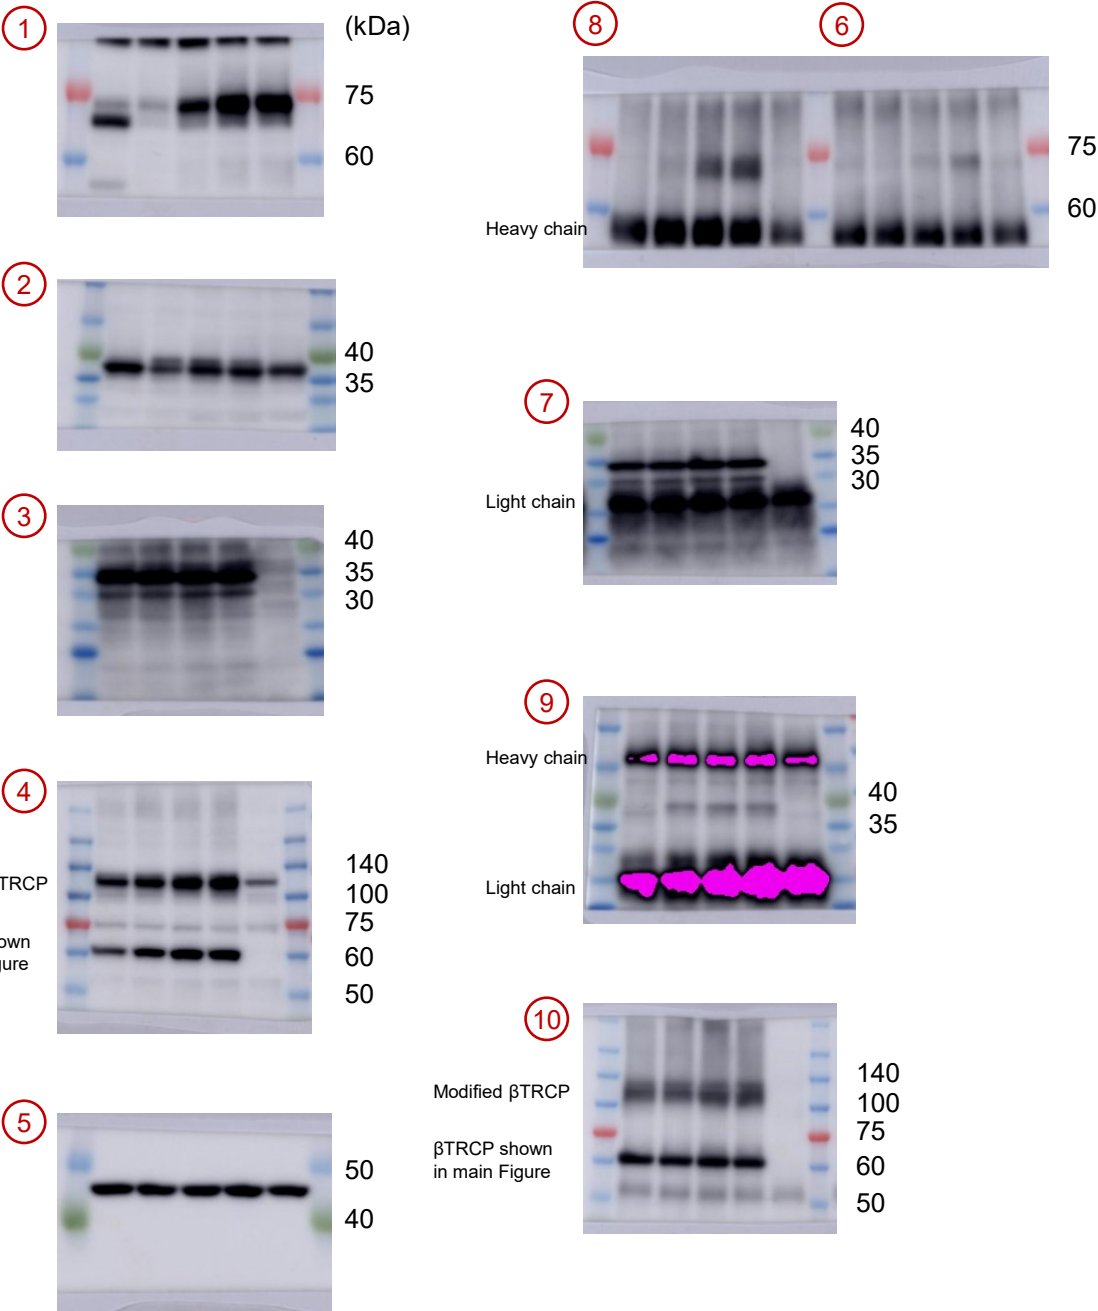

Figure 1-D

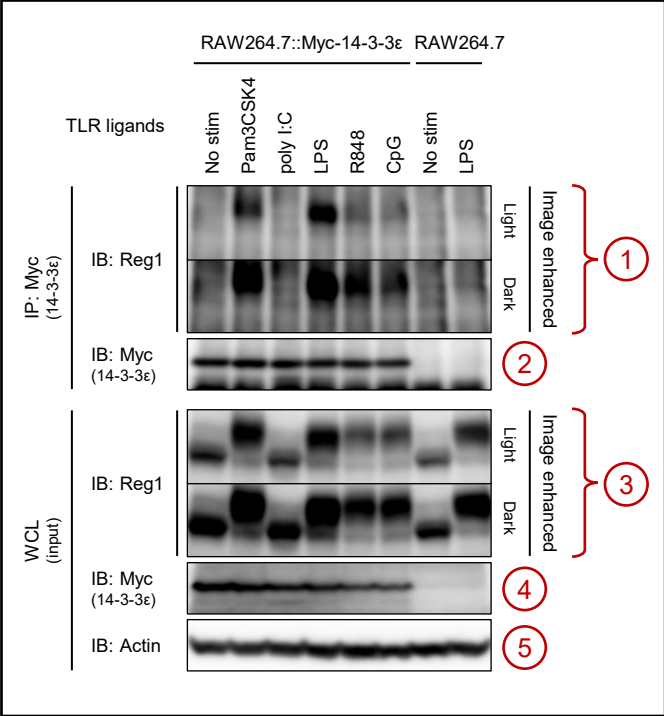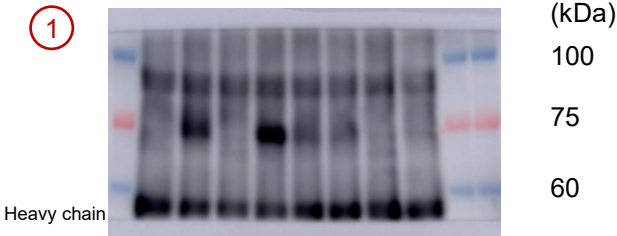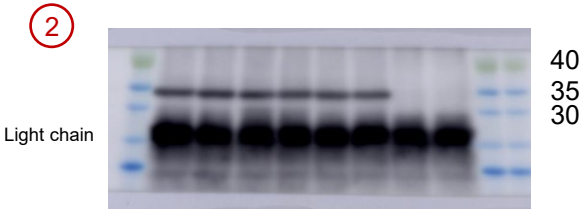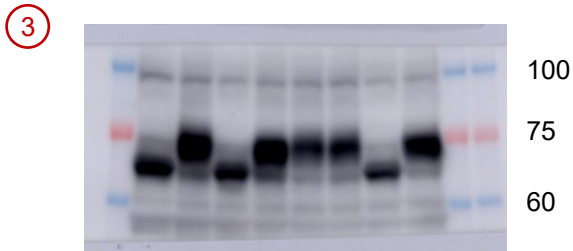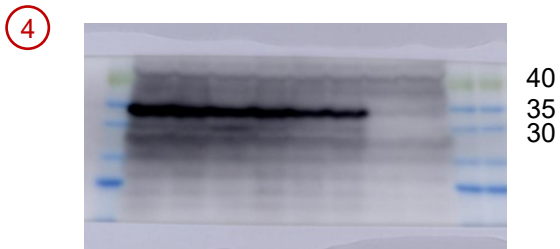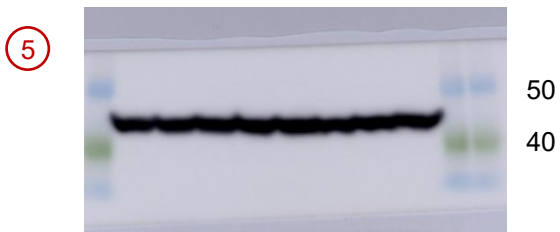

Figure 2-A

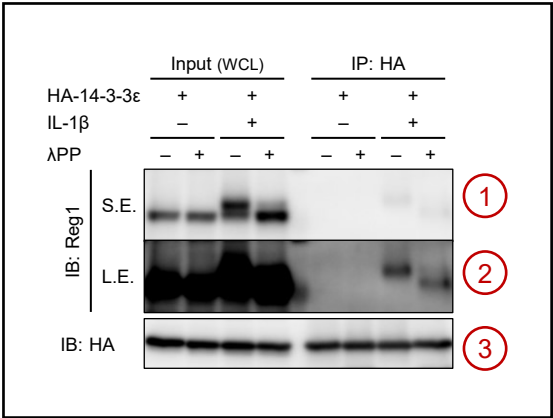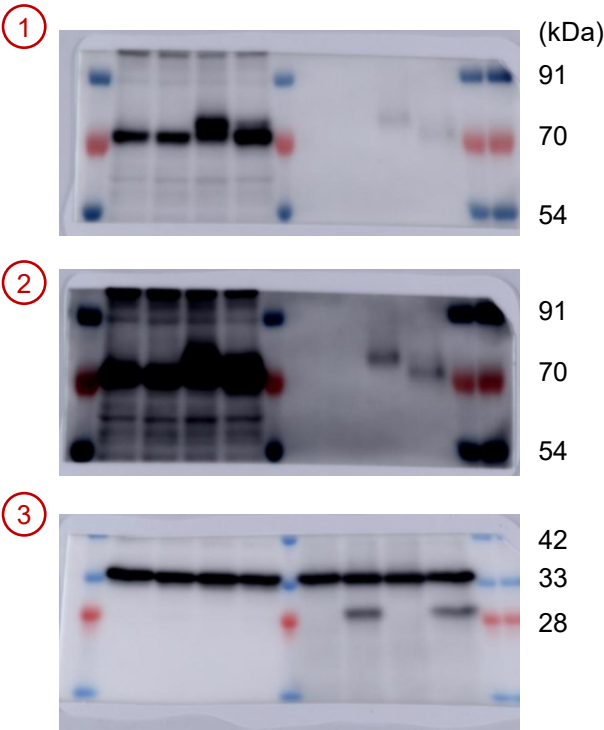

Figure 2-D

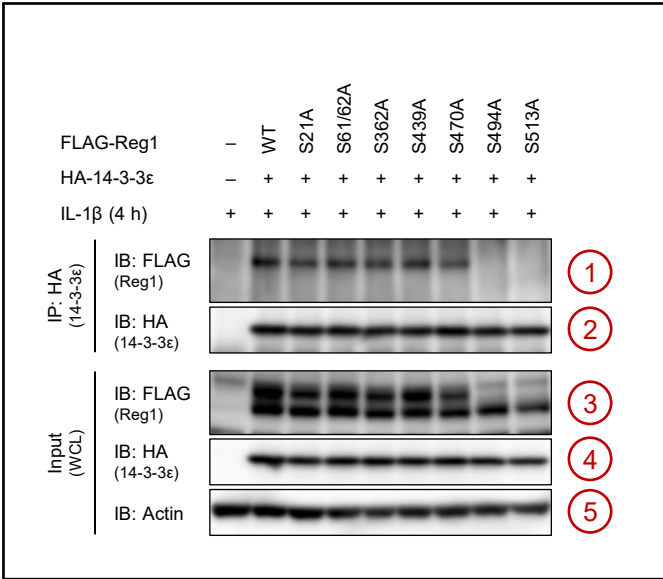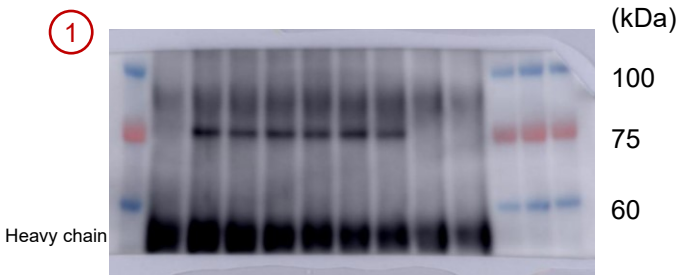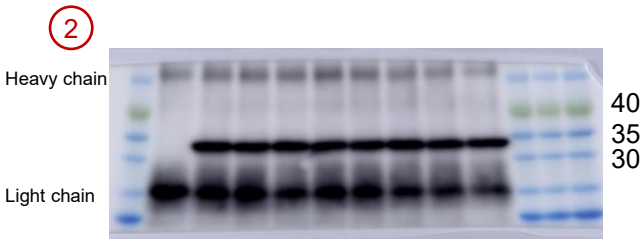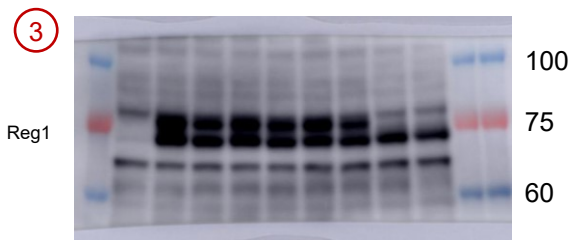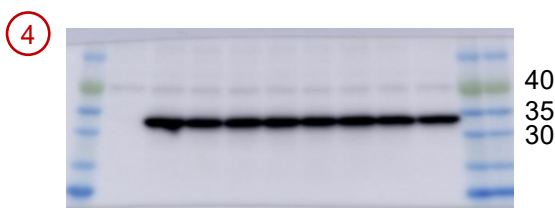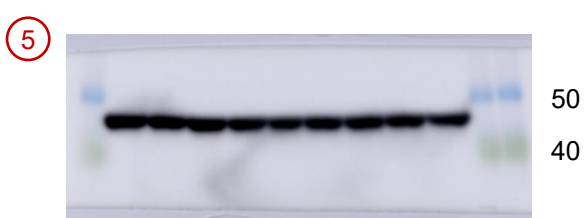

Figure 2-G

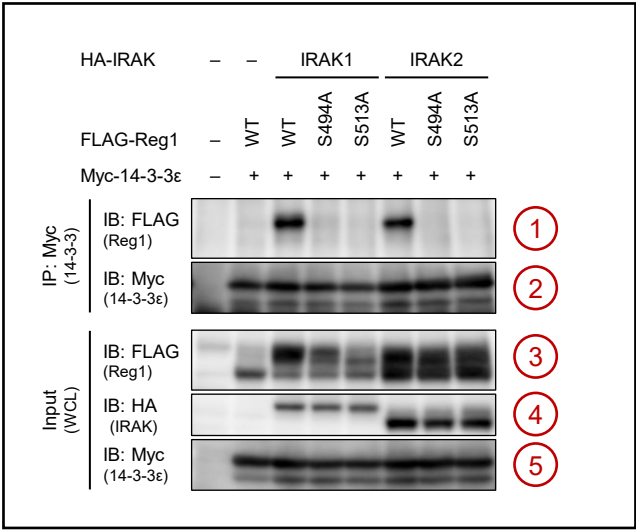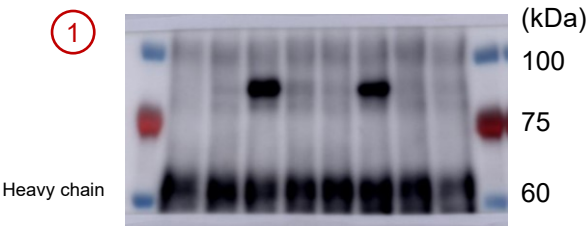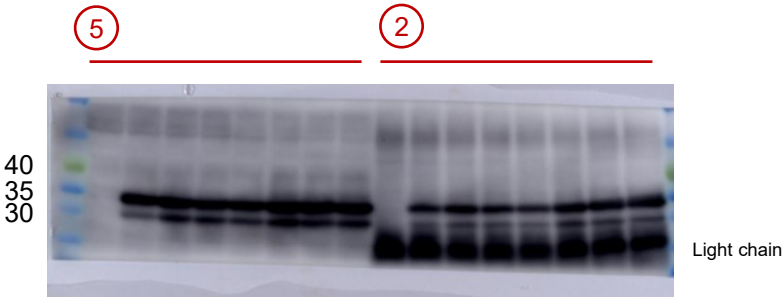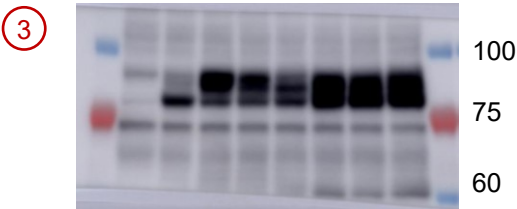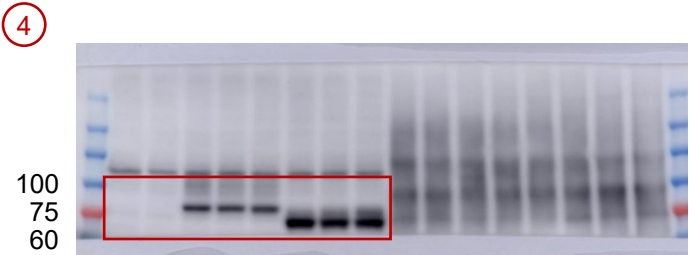

Figure 2-I

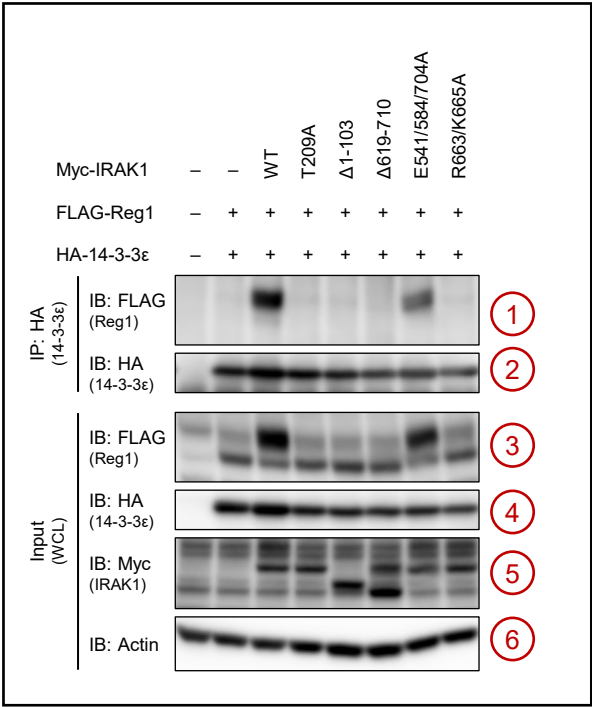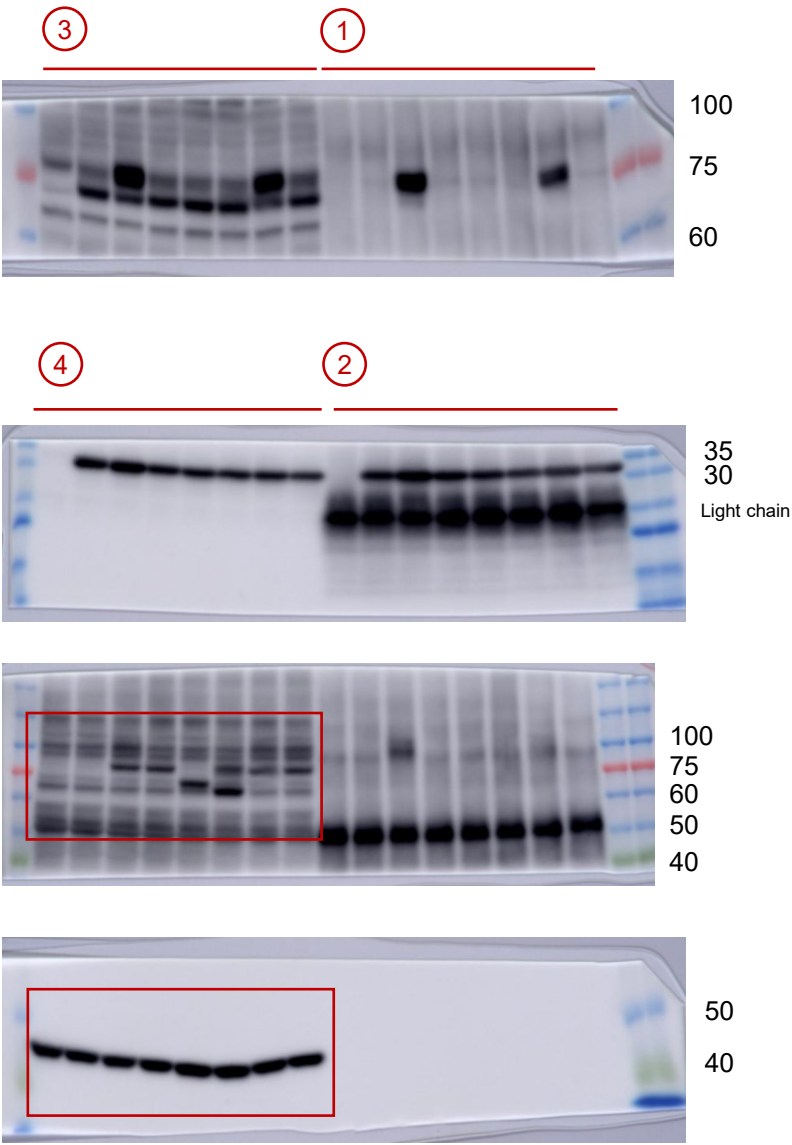

Figure 3-A

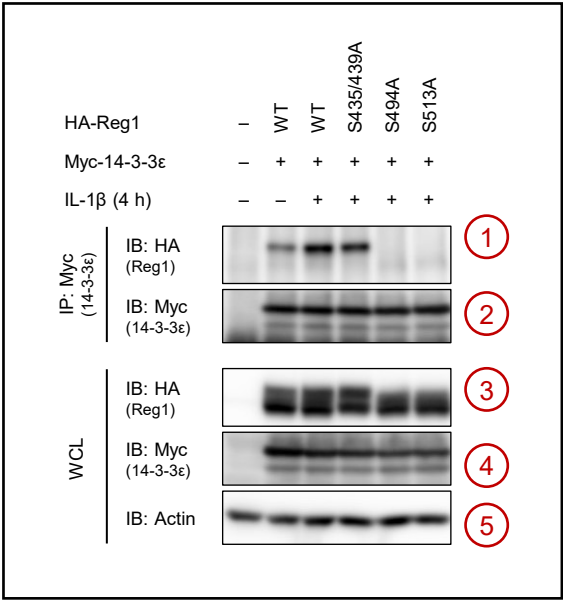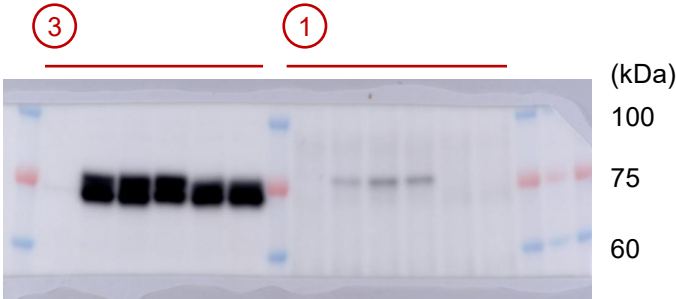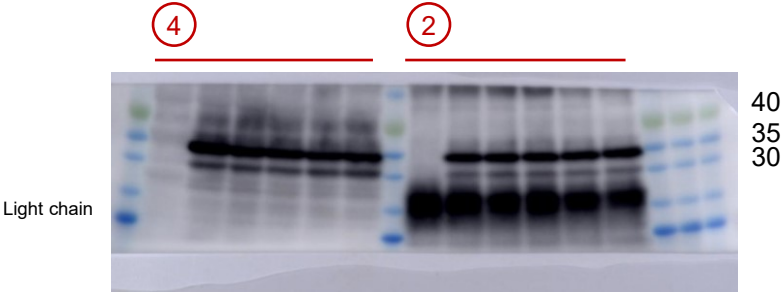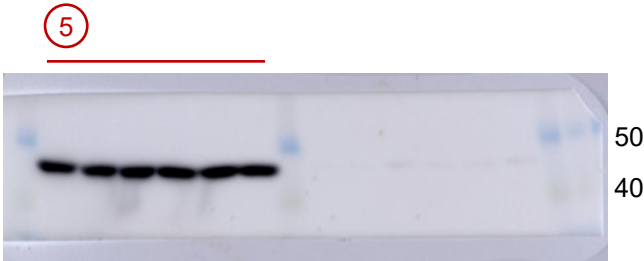

|                      |                      |                                                                                   | - | WT | WT | S435/439A | S494A | S513A |   |
|----------------------|----------------------|-----------------------------------------------------------------------------------|---|----|----|-----------|-------|-------|---|
| HA-Reg1              |                      |                                                                                   | - | WT | WT | S435/439A | S494A | S513A |   |
| FLAG-βTRCP1          |                      |                                                                                   | - | +  | +  | +         | +     | +     |   |
| IL-1β (4 h)          |                      |                                                                                   | - | -  | +  | +         | +     | +     |   |
| IP: FLAG<br>(βTRCP1) | IB: HA<br>(Reg1)     |  |   |    |    |           |       |       | 1 |
|                      | IB: FLAG<br>(βTRCP1) |  |   |    |    |           |       |       | 2 |
| Input<br>(WCL)       | IB: HA<br>(Reg1)     |  |   |    |    |           |       |       | 3 |
|                      | IB: FLAG<br>(βTRCP1) |  |   |    |    |           |       |       | 4 |
|                      | IB: Actin            |  |   |    |    |           |       |       | 5 |

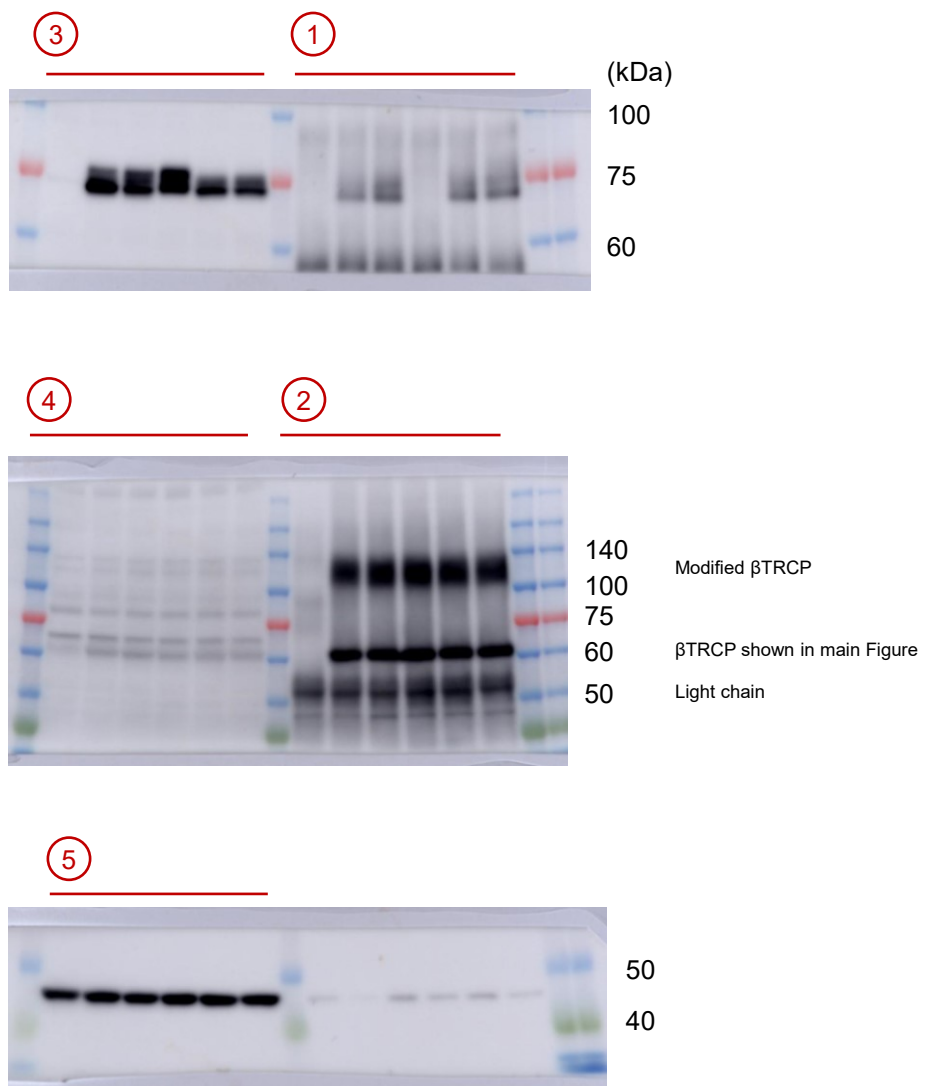



Figure 3-C

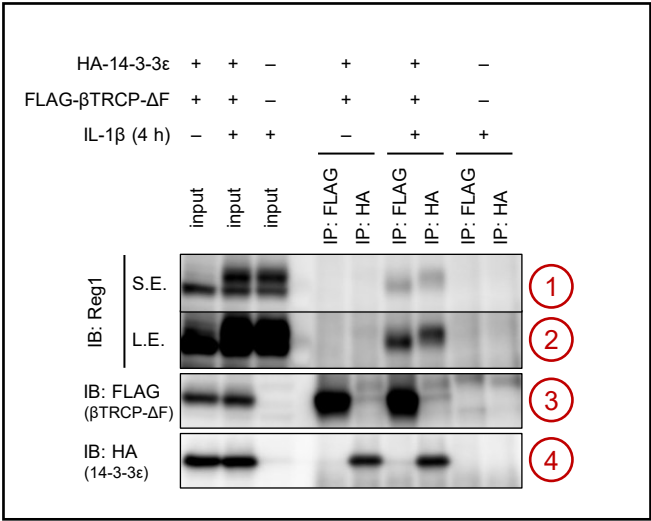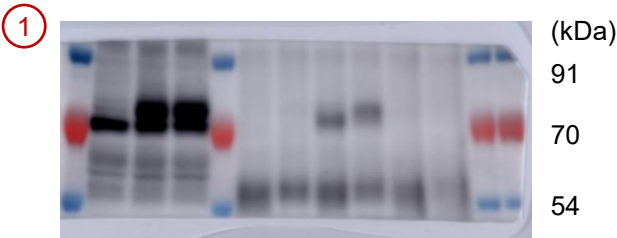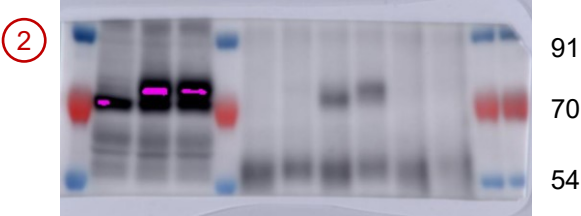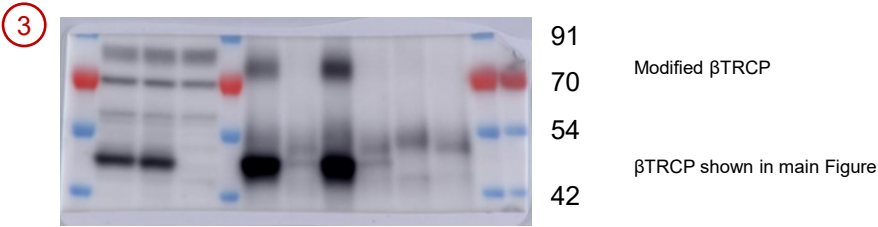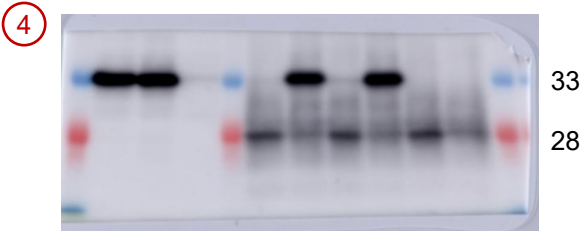

Figure 4-A

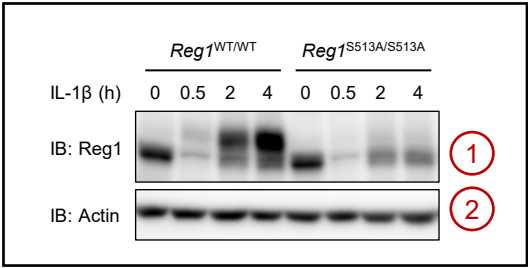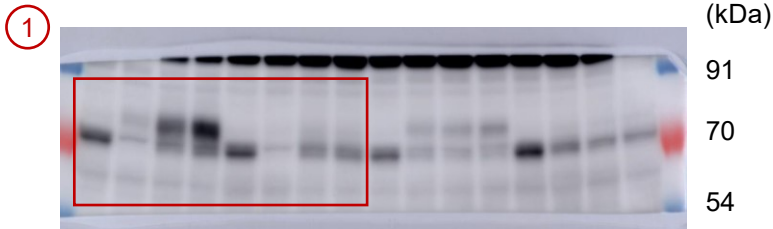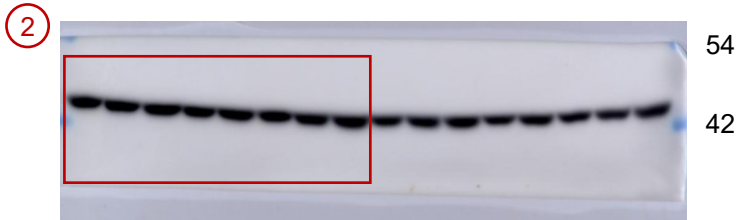

Figure 4-B

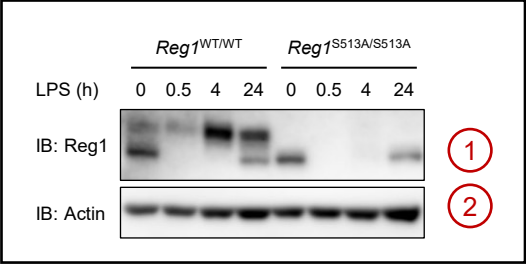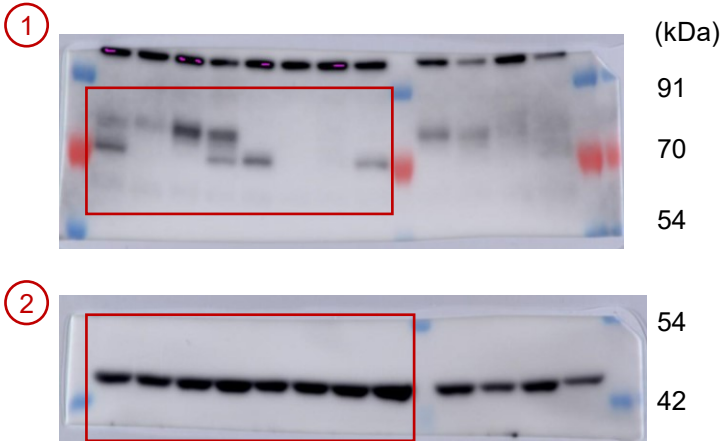

Figure 4-C

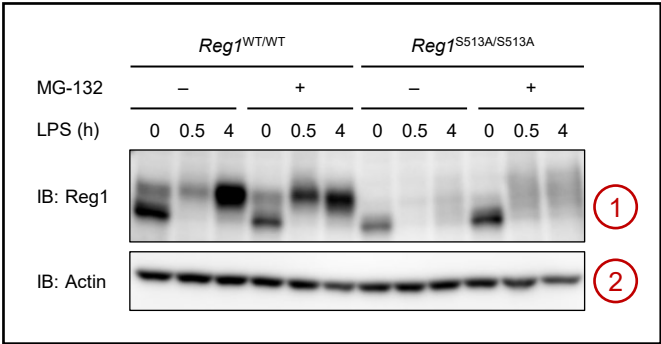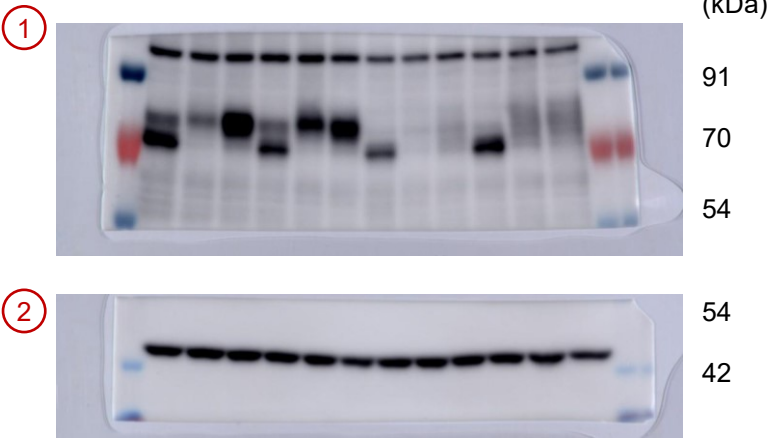

Figure 5-A

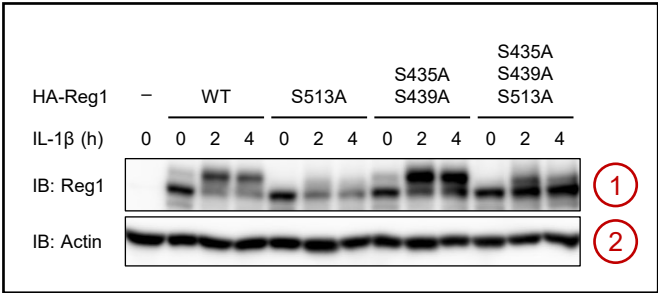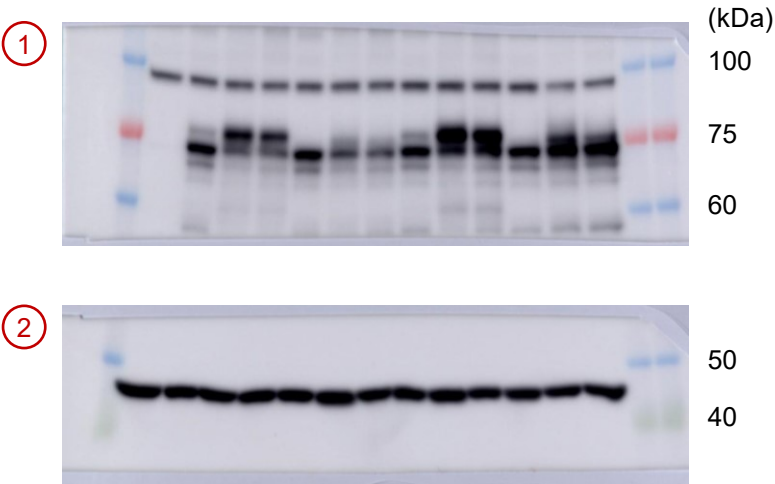

Figure 5-C

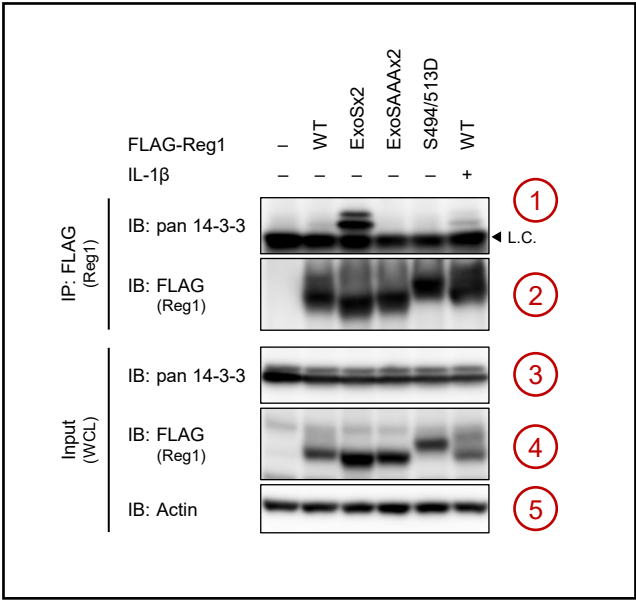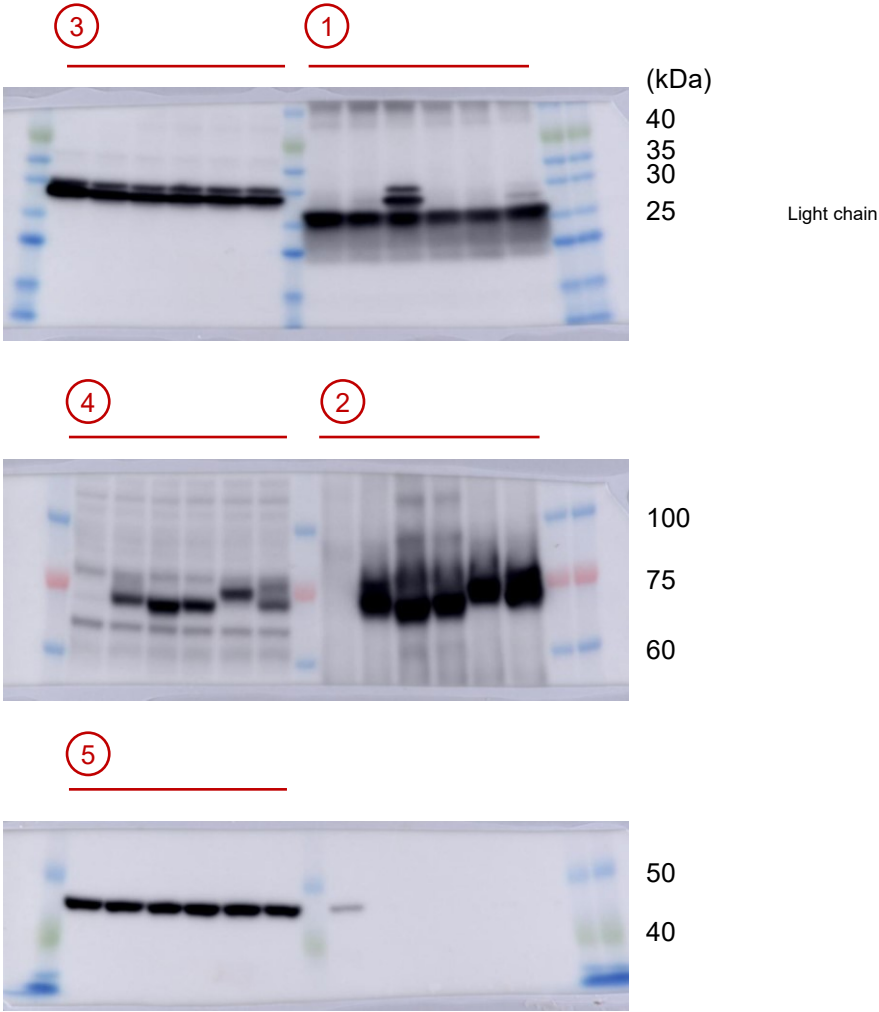

Supplement: supp [file elife-71966-supp-v1.zip]
