# Supplementary material for: IRAK1-dependent Regnase-1-14-3-3 complex formation controls Regnase-1-mediated mRNA decay
Source: eLife journal article supplement (doi:10.7554/elife.71966), 2021-10-12
Supplement: supp [file elife-71966-supp-v1.zip]

# Phosphosite: S454, Mascot ion score : 118

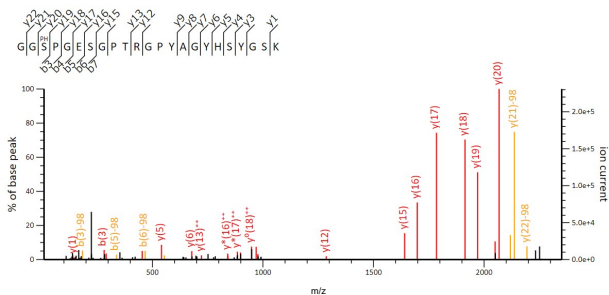

# pSite: S494 Mascot ion score: 67

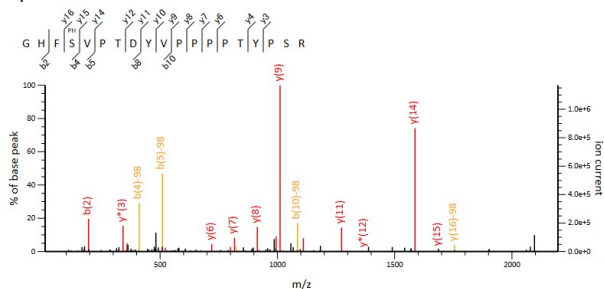

# pSite S513 Mascot ion score : 31

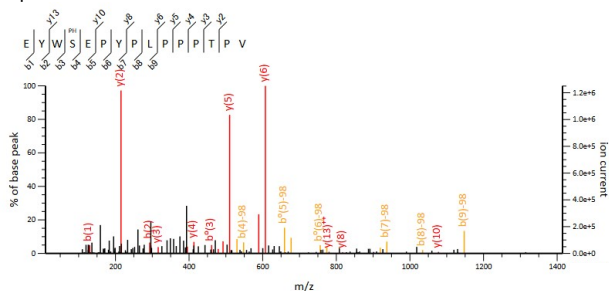

Figure 2-figure supplement 7
