# Supplementary material for: IRAK1-dependent Regnase-1-14-3-3 complex formation controls Regnase-1-mediated mRNA decay
Source: eLife journal article supplement (doi:10.7554/elife.71966), 2021-10-12
Supplement: supp [file elife-71966-supp-v1.zip]

Y18 Y16 Y15 Y14 Y13 Y12 Y11 Y10 Y9 Y8 Y7 Y6 Y5 Y4 Y3 Y1  
G H F S V P T D Y V P P P P T Y P S R  
223 224 225 226 227 228 229 230 231 232 233 234 235 236 237 238

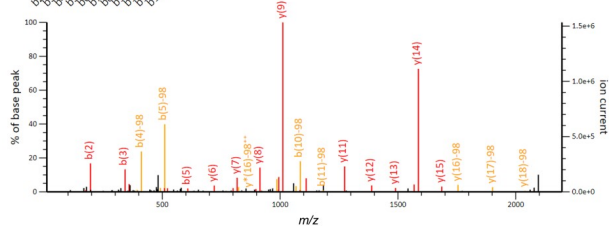

K L G Y S S E I H

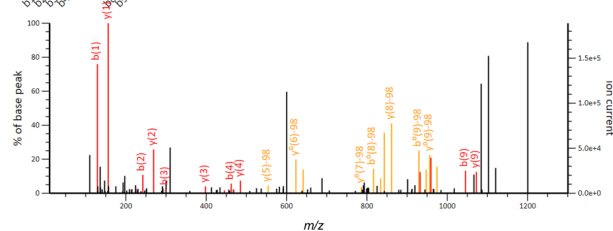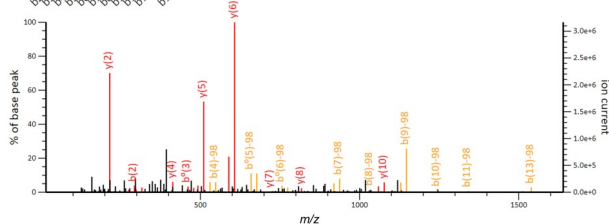

Y9 Y8 Y7 Y6 Y5 Y2 Y1  
K L G Y S S S E I H  
b1 b2 b3 b4 b5 b8 b9

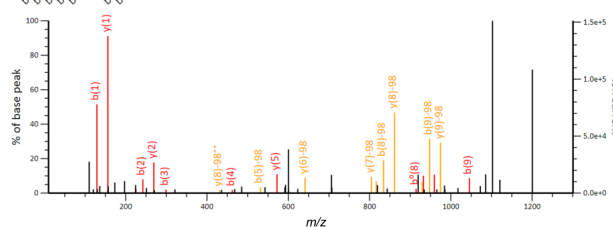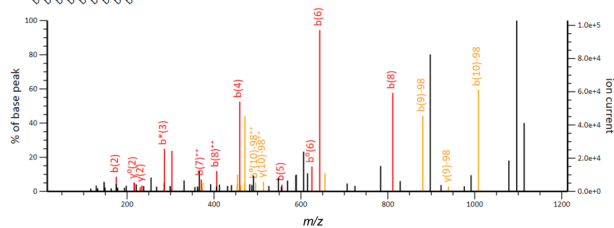

E C L D S G I G S<sup>PH</sup> L E S Q M S E L W G V R  
 b<sub>2</sub> b<sub>3</sub> b<sub>4</sub> b<sub>6</sub> b<sub>7</sub> b<sub>9</sub> b<sub>11</sub> y<sub>11</sub> y<sub>10</sub> y<sub>9</sub> y<sub>8</sub> y<sub>7</sub> y<sub>6</sub> y<sub>5</sub> y<sub>4</sub> y<sub>3</sub> y<sub>1</sub>

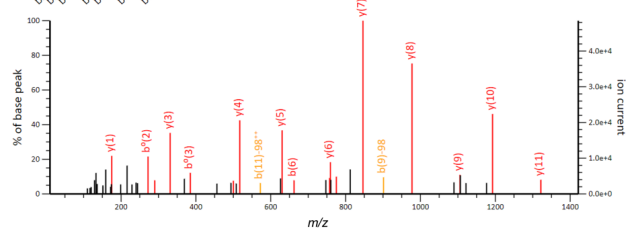

$y_8$   $y_7$   $y_6$   $y_5$   $y_4$   $y_3$   $y_2$   $y_1$   
 A G Y H S Y G S K  
 $b_2$   $b_5$   $b_7$   $b_8$

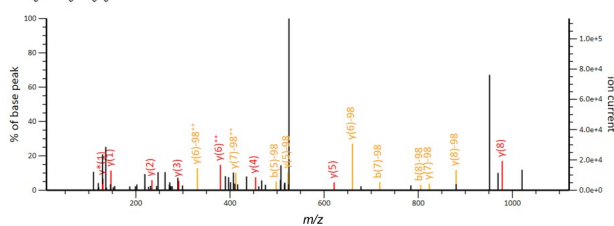

$\begin{matrix} y_6 & y_5 & y_4 & y_3 & y_2 & y_1 \\ | & | & | & | & | & | \\ L & W & S & L & E & D & R \\ | & | & | & | & | & | \\ b_2 & b_3 & & & & & \end{matrix}$

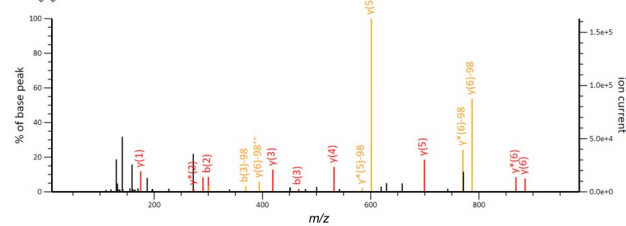

Figure 2-figure supplement 2
