# Supplementary material for: IRAK1-dependent Regnase-1-14-3-3 complex formation controls Regnase-1-mediated mRNA decay
Source: eLife. 2021 Oct 12;10:e71966. doi: 10.7554/eLife.71966 (PMC8553338; doi:10.7554/eLife.71966)
Supplement: Supplementary file 1. [file elife-71966-supp1.xlsx]

## Sheet: Sheet1
Gene	Species	Forword or Reverse	Sequence (5' to 3')
Il6	mouse	Forward	GTAGCTATGGTACTCCAGAAGAC
Il6	mouse	Reverse	ACGATGATGCACTTGCAGAA
Zc3h12a	mouse	Forward	CGAGAGGCAGGAGTGGAAAC
Zc3h12a	mouse	Reverse	CTTACGAAGGAAGTTGTCCAGGCTAG
Nfkbiz	mouse	Forward	CTCCGACTCCTCCGATTTCTC
Nfkbiz	mouse	Reverse	GCTTGTTGCTTCGGATGTGTAG
Actb	mouse	Forward	GGCTGTATTCCCCTCCATCG
Actb	mouse	Reverse	CCAGTTGGTAACAATGCCATGT
18S	mouse/human	Forward	CGGACAGGATTGACAGATTG
18S	mouse/human	Reverse	CAAATCGCTCCACCAACTAA
IL6	human	Forward	CAGCCACTCACCTCTTCAGAAC
IL6	human	Reverse	GCATCCATCTTTTTCAGCCATCTTTGG
PTGS2	human	Forward	CATGTCAAAACCGAGGTGTATG
PTGS2	human	Reverse	GAAGTGGGTAAGTATGTAGTGCAC
NFKBIZ	human	Forward	GAAAGGGCCCGATTCGTTGTCTG
NFKBIZ	human	Reverse	GAAGCAGATCAGCACTGCTCTC
ZC3H12A	human	Forward	GAAGAGGAAAAGGAGGGCAG
ZC3H12A	human	Reverse	CTCCAGGATGGCACAAACAC
CXCL1	human	Forward	GAATTCACCCCAAGAACATC
CXCL1	human	Reverse	CTTCTGGTCAGTTGGATTTG
CXCL2	human	Forward	GAACTGCGCTGCCAGTGCTTG
CXCL2	human	Reverse	GATTTTCTTAACCATGGGCGATG
CXCL3	human	Forward	GTGGTCACTGAACTGCGCTG
CXCL3	human	Reverse	GATTTTCTGAACCATGGGGGATG
MAFK	human	Forward	CGACTAATCCCAAACCGAATAAGG
MAFK	human	Reverse	GTTCTTGAGTGTGCGCCGAC
NFKBID	human	Forward	CTCCTGACTTCTACCCACCCTC
NFKBID	human	Reverse	CCAAAGCCAGCATGTGAGCTC
NFKBIA	human	Forward	GAGGAGTACGAGCAGATGGTC
NFKBIA	human	Reverse	CAGGTTGTTCTGGAAGTTGAG
ACTB	human	Forward	CACCATTGGCAATGAGCGGTTCC
ACTB	human	Reverse	CTTCTGCATCCTGTCGGCAATGC
