# Supplementary figures and images for: IRAK1-dependent Regnase-1-14-3-3 complex formation controls Regnase-1-mediated mRNA decay
Source: eLife journal article supplement (doi:10.7554/elife.71966), 2021-10-12

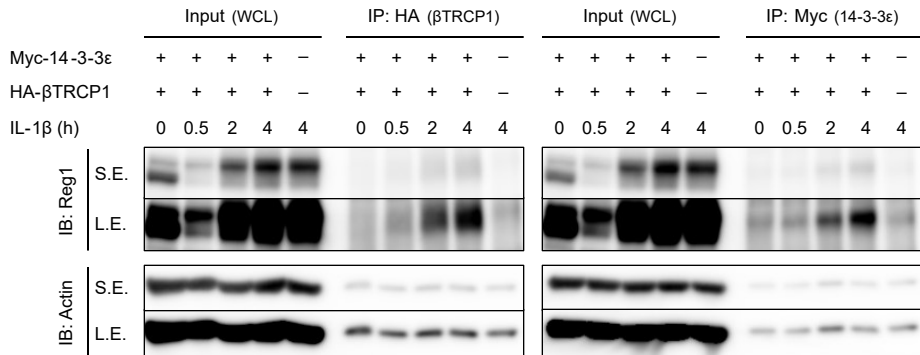

Figure 1-figure supplement 1

Supplement: supp [file elife-71966-supp-v1.zip]

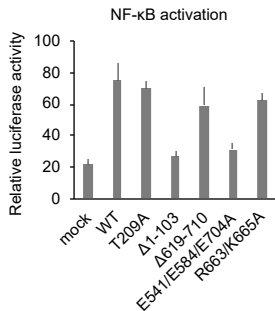

Figure 2-figure supplement 5

Supplement: supp [file elife-71966-supp-v1.zip]

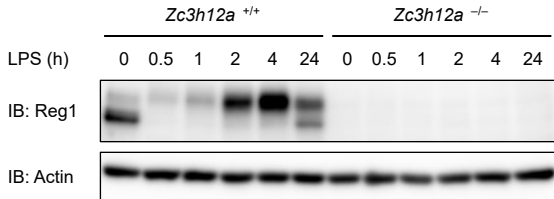

Figure 2-figure supplement 1

Supplement: supp [file elife-71966-supp-v1.zip]

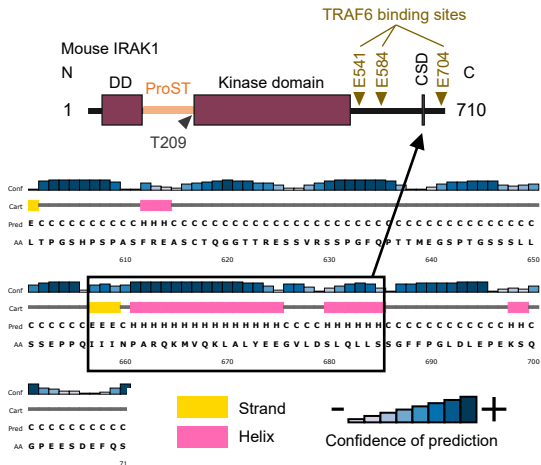

Figure 2-figure supplement 4

Supplement: supp [file elife-71966-supp-v1.zip]

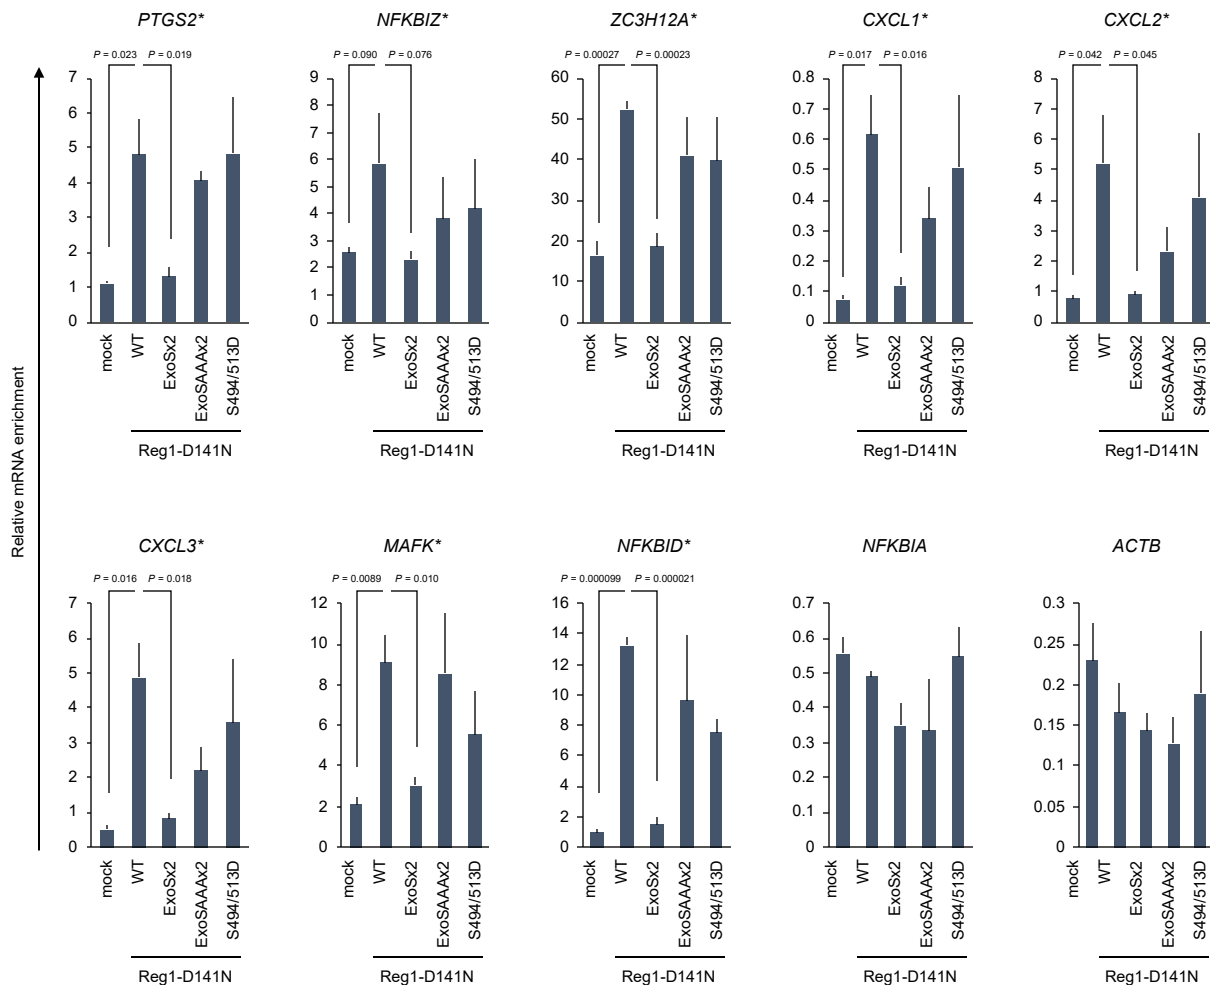

Figure 5-figure supplement 2

Supplement: supp [file elife-71966-supp-v1.zip]

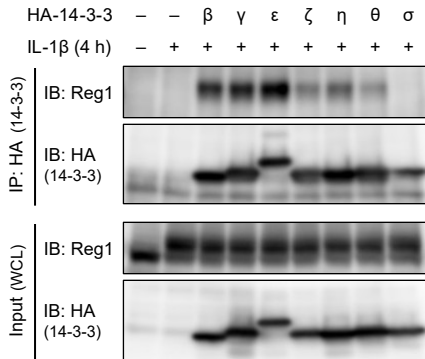

Figure 1-figure supplement 2

Supplement: supp [file elife-71966-supp-v1.zip]

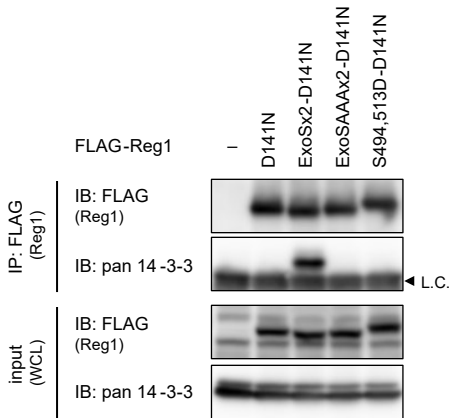

Figure 5-figure supplement 1

Supplement: supp [file elife-71966-supp-v1.zip]

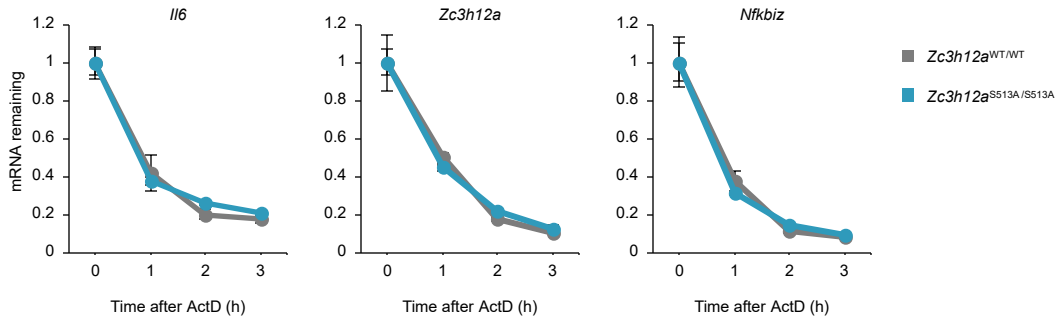

Figure 4-figure supplement 4

Supplement: supp [file elife-71966-supp-v1.zip]

***Zc3h12a* (Reg1)**

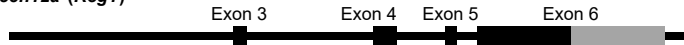

***Zc3h12a*<sup>WT/WT</sup>**

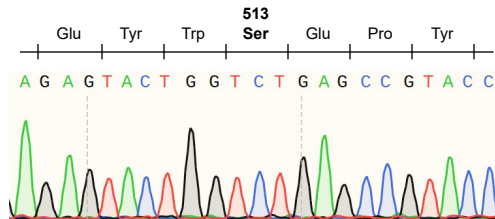

***Zc3h12a*<sup>S513A/S513A</sup>**

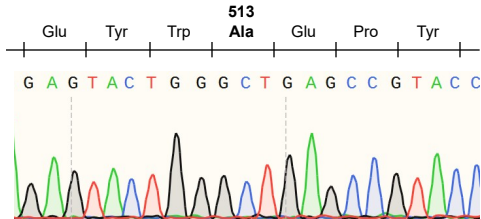

Figure 4-figure supplement 1

Supplement: supp [file elife-71966-supp-v1.zip]

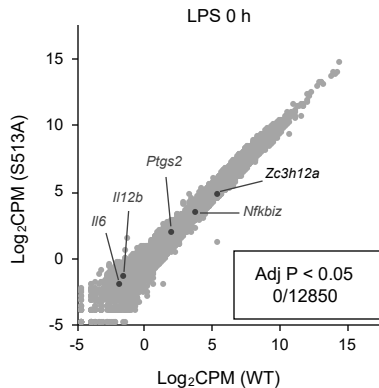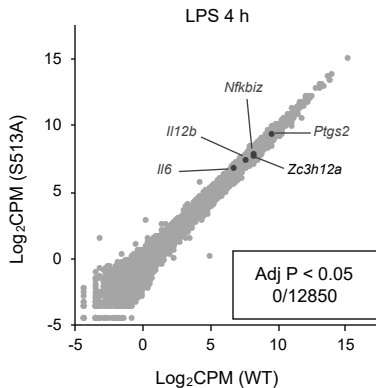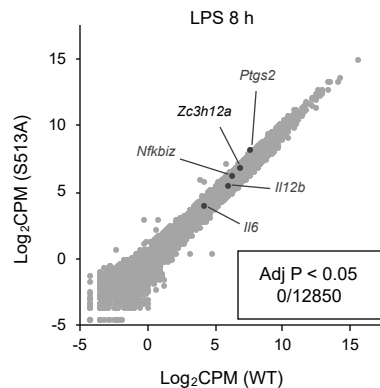

Figure 4-figure supplement 5

Supplement: supp [file elife-71966-supp-v1.zip]

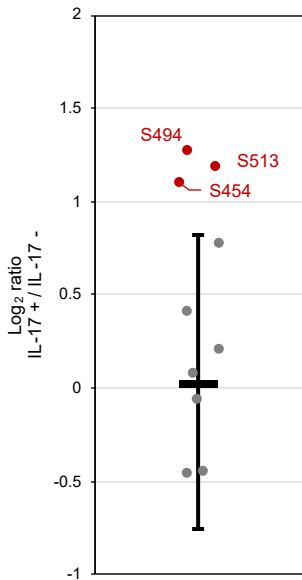

Figure 2-figure supplement 6

Supplement: supp [file elife-71966-supp-v1.zip]

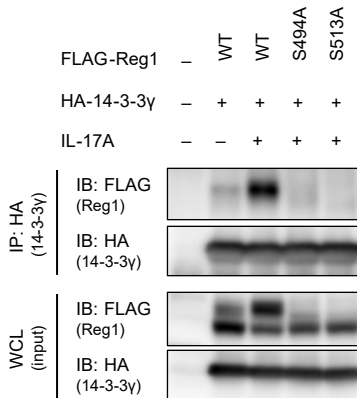

Figure 2-figure supplement 8

Supplement: supp [file elife-71966-supp-v1.zip]

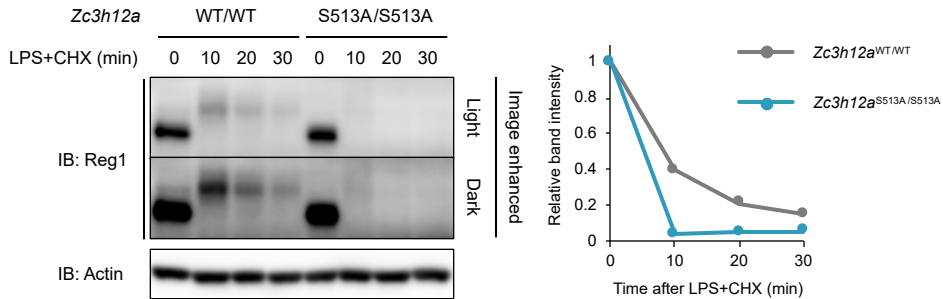

Figure 4-figure supplement 2

Supplement: supp [file elife-71966-supp-v1.zip]

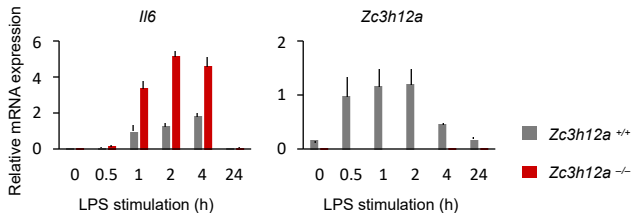

Figure 4-figure supplement 3

Supplement: supp [file elife-71966-supp-v1.zip]

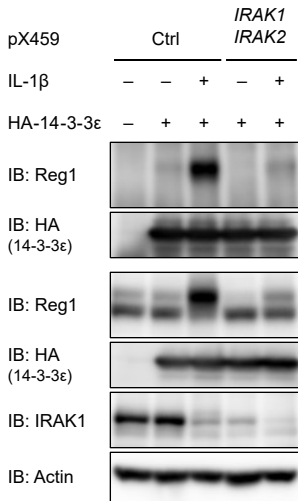

Figure 2-figure supplement 3

Supplement: supp [file elife-71966-supp-v1.zip]
